# Supplementary material for: A flexible piezoresistive strain sensor based on MXene/bacterial cellulose hydrogel with high mechanical strength for real-time monitoring of human motions
Source: Royal Society of Chemistry journal article supplement (doi:10.1039/d3tc03416j), 2024-01-01
Supplement: d3tc03416j1.pdf [file d3tc03416j1.pdf]

**A flexible piezoresistive strain sensor based on MXene/bacterial cellulose hydrogel  
with high mechanical strength for real-time monitoring of human motions**

*Yuwen Gai<sup>a</sup>, Luyu Yang<sup>ab\*</sup>, Wei Shen<sup>a</sup>, Fengyan Tan<sup>a</sup>, Qingqing Yu<sup>a</sup>, Lei Zhang<sup>a\*</sup>, and  
Dongping Sun<sup>a\*</sup>*

<sup>a</sup> Institute of Chemicobiology and Functional Materials, School of Chemistry and  
Chemical Engineering, Nanjing University of Science and Technology, 200 Xiao  
Ling Wei, Nanjing 210094, China

<sup>b</sup> Biofuels Institute, School of Environment and Safety Engineering, Jiangsu University,  
301 Xuefu Road, Zhenjiang 212013, China

\*Corresponding author, E-mail:

Yangluyu0928@163.com (Luyu Yang);

leizhang@njust.edu.cn (Lei Zhang);

sundpe301@163.com (Dongping Sun).

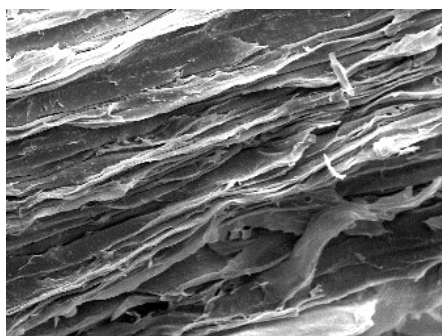

**Figure S1.** Cross-section SEM micrograph of rBC/MXene hydrogel after elongation break.

**Figure S2.** Cross-section SEM micrograph of rBC/MXene hydrogel after compression.

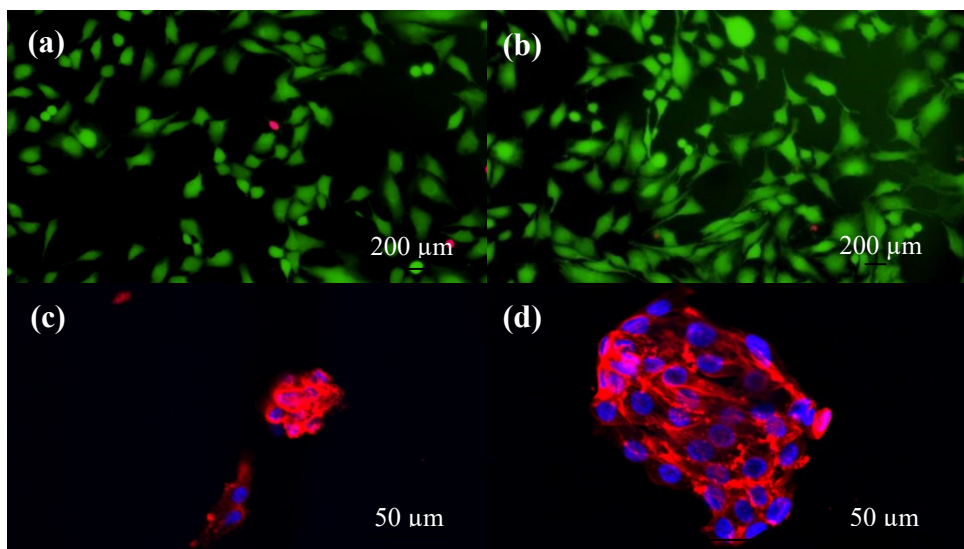

**Figure S3.** Fluorescence microscopic images of C2C12 cells after live/dead staining, which were seeded onto (a) rBC and (b) rBC/MXene-35 hydrogels and cultured for 24 h. Confocal microscopic images of C2C12 cells after seeding on (c) rBC and (d) rBC/MXene-35 hydrogels for 24 h. The cell skeleton and nucleus were shown in red

and blue, respectively.

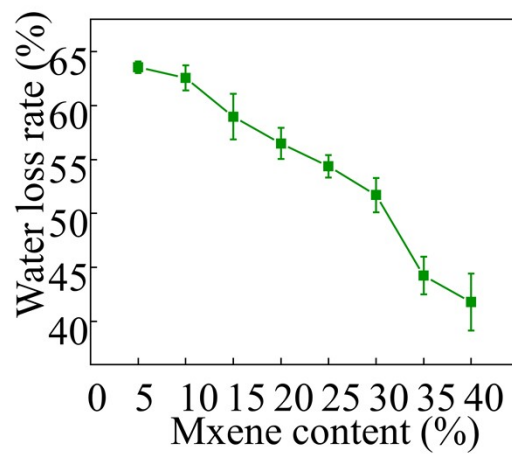

**Figure S4.** Water loss rate of hydrogels after stretching 100%.

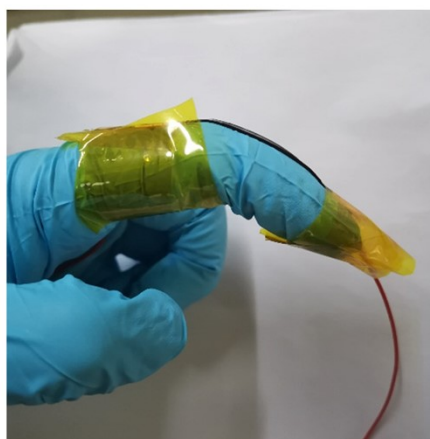

**Figure S5.** Physical diagram of the use of the sensor.

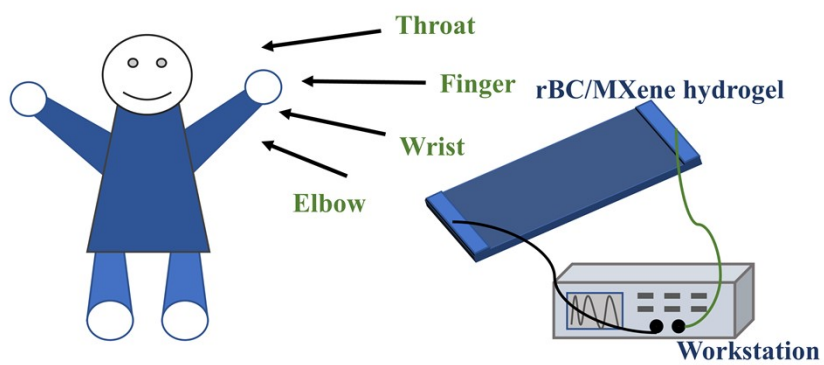

**Figure S6.** Schematic diagram of the use of the sensor.

**Table S1.** Comparing the breaking strength and GF value of this work with those from other sensors.

#### References

[1] Shintake J, Piskarev Y, Jeong S H, et al. Ultrastretchable strain sensors using carbon black-filled elastomer composites and comparison of capacitive versus resistive

| Number | Sensing material              | Breaking Strength (MPa) | GF     | Ref.      |
|--------|-------------------------------|-------------------------|--------|-----------|
| 1      | Ecoflex-CB                    | 0.125                   | 0.98   | [1]       |
| 2      | pDA-rGO-AgNWs-Sponges         | 0.0547                  | 1.5    | [2]       |
| 3      | CCP                           | 0.7                     | 10.1   | [3]       |
| 4      | PVA/AgNPs                     | 0.5377                  | 0.75   | [4]       |
| 5      | PAni-PAAm-GOCS                | 1.81                    | 2.56   | [5]       |
| 6      | PVA/MXene-Ag/sucrose          | 0.025                   | 3.92   | [6]       |
| 7      | cotton/graphene inks          | 0.02                    | 22.6   | [7]       |
| 8      | PVA/PEI                       | 0.96                    | 22     | [8]       |
| 9      | P(AMPS/AAm)-CS                | 0.111                   | 2.011  | [9]       |
| 10     | RSF/CaCl <sub>2</sub> /HRP    | 0.04                    | 2.37   | [10]      |
| 11     | CMC                           | 1.54                    | 0.55   | [11]      |
| 12     | PAM/PDA                       | 0.092                   | 3.4    | [12]      |
| 13     | AMPS/APS/MBA                  | 0.0917                  | 0.2448 | [13]      |
| 14     | PAAc/SiO <sub>2</sub> -g-PAAm | 0.0346                  | 5.86   | [14]      |
| 14     | rBC/MXene                     | 2.5                     | 5.15   | This work |

sensors[J]. Advanced Materials Technologies, 2018, 3(3): 1700284.

[2] Dong X, Wei Y, Chen S, et al. A linear and large-range pressure sensor based on a graphene/silver nanowires nanobiocomposites network and a hierarchical structural sponge[J]. Composites Science and Technology, 2018, 155: 108-116.

[3] Chen S, Song Y, Ding D, et al. Flexible and anisotropic strain sensor based on carbonized crepe paper with aligned cellulose fibers[J]. Advanced Functional

- Materials, 2018, 28(42): 1802547.
- [4] Wu Y, Chen E, Weng X, et al. Conductive polyvinyl alcohol/silver nanoparticles hydrogel sensor with large draw ratio, high sensitivity and high stability for human behavior monitoring[J]. Engineered Science, 2022, 18: 113-120.
  - [5] Jin X, Jiang H, Li G, et al. Stretchable, conductive PAni-PAAm-GOCS hydrogels with excellent mechanical strength, strain sensitivity and skin affinity[J]. Chemical Engineering Journal, 2020, 394: 124901.
  - [6] Li C, Zheng A, Zhou J, et al. A self-adhesive, self-healing and antibacterial hydrogel based on PVA/MXene-Ag/sucrose for fast-response, high-sensitivity and ultra-durable strain sensors[J]. New Journal of Chemistry, 2023, 47(14): 6621-6630.
  - [7] Li K, Yang W, Yi M, et al. Graphene-based pressure sensor and strain sensor for detecting human activities[J]. Smart Materials and Structures, 2021, 30(8): 085027.
  - [8] Wang C, Hu K, Zhao C, et al. Customization of conductive elastomer based on PVA/PEI for stretchable sensors[J]. Small, 2020, 16(7): 1904758.
  - [9] Jin R, Xu J, Duan L, et al. Chitosan-driven skin-attachable hydrogel sensors toward human motion and physiological signal monitoring[J]. Carbohydrate Polymers, 2021, 268: 118240.
  - [10] Zhao B, Chen Q, Da G, et al. A highly stretchable and anti-freezing silk-based conductive hydrogel for application as a self-adhesive and transparent ionotronic skin[J]. Journal of Materials Chemistry C, 2021, 9(28): 8955-8965.
  - [11] Li J, Chen F, Lin X, et al. Hydrogen-bonding-assisted toughening of hierarchical carboxymethyl cellulose hydrogels for biomechanical sensing[J]. Carbohydrate Polymers, 2021, 269: 118252.
  - [12] Zhang G, Chen S, Peng Z, et al. Topologically enhanced dual-network hydrogels with rapid recovery for low-hysteresis, self-adhesive epidemic electronics[J]. ACS Applied Materials & Interfaces, 2021, 13(10): 12531-12540.
  - [13] Mao J, Zhao C, Liu L, et al. Adhesive, transparent, stretchable, and strain-sensitive hydrogel as flexible strain sensor[J]. Composites Communications, 2021, 25: 100733.
  - [14] Yu X, Zheng Y, Zhang H, et al. Fast-recoverable, self-healable, and adhesive nanocomposite hydrogel consisting of hybrid nanoparticles for ultrasensitive strain and pressure sensing[J]. Chemistry of materials, 2021, 33(15): 6146-6157.
